# Supplementary material for: Comparing Achievement of National Psoriasis Foundation Treatment Targets among Patients with Plaque Psoriasis Treated with Ixekizumab versus Other Biologics in Clinical and Real-World Studies
Source: Springer Nature journal article supplement (doi:10.1007/s13555-024-01136-w), 2024-03-23
Supplement: MOESM1 [file 26896852]

## **SUPPLEMENTARY MATERIAL**

**Title:** Comparing achievement of National Psoriasis Foundation treatment targets among patients with psoriasis treated with ixekizumab versus other biologics in clinical and real-world studies

**Authors:** April Armstrong<sup>1</sup>, Alvaro González-Cantero<sup>2,3</sup>, Saakshi Khattri<sup>4</sup>, Guilherme Muzy<sup>5</sup>, William N. Malatestinic<sup>6</sup>, Anastasia Lampropoulou<sup>6</sup>, Meghan Feely McDonald<sup>4,6</sup>, Sophia Kyoungah See<sup>6</sup>, Can Mert<sup>7</sup>, Andrew Blauvelt<sup>8</sup>

**Affiliations:** <sup>1</sup>University of California Los Angeles, Los Angeles, CA, USA; <sup>2</sup>Ramón y Cajal University Hospital in Madrid, Spain; <sup>3</sup>Faculty of Medicine, Universidad Francisco de Vitoria, Madrid, Spain; <sup>4</sup>Mount Sinai Hospital, New York, NY, USA; <sup>5</sup>Clinica Muzy, São Paulo, Brazil; <sup>6</sup>Eli Lilly and Company, Indianapolis, IN, USA; <sup>7</sup>HaaPACS GmbH, Schriesheim, Germany; <sup>8</sup>Oregon Medical Research Center, Portland, OR, USA

**Corresponding author:** Andrew Blauvelt, MD, MBA, Oregon Medical Research Center, 9495 SW Locust St., Suite G, Portland, OR 97223, USA.

E-mail: [ablauvelt@oregonmedicalresearch.com](mailto:ablauvelt@oregonmedicalresearch.com)



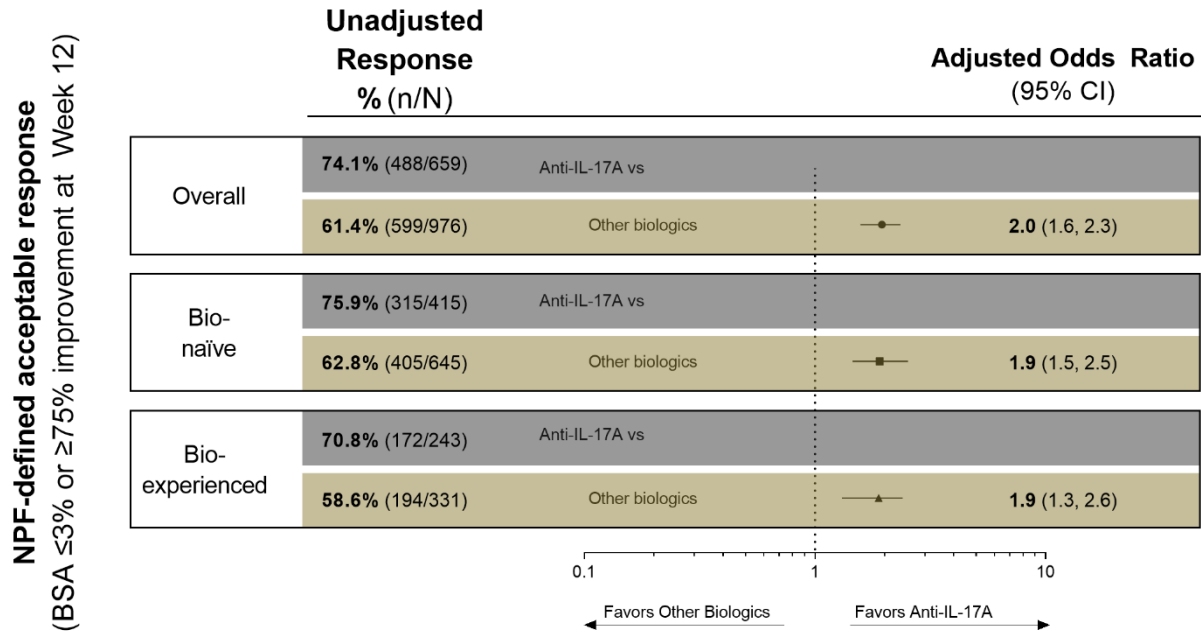

**Figure S2. Actual response rates and comparative adjusted odds ratios for NPF acceptable treatment responses in the overall, bio-naïve, and bio-experienced subpopulations of the real-world Psoriasis Study of Health Outcomes.**

Missing data were imputed using the NRI method for proportions (%) of patients who achieved BSA  $\leq 3\%$  or a  $\geq 75\%$  improvement in BSA at Week 12. Adjusted odds ratios calculated using FMA. Results are statistically significant if 1 is not covered by the 95% CI for the odds ratio. *Abbreviations: bio, biologic; BSA, body surface area; CI, confidence interval; FMA, frequentist model averaging; IL-17A, interleukin-17A; NPF, National Psoriasis Foundation; NRI, non-response imputation*

Supplementary Material

|                                                  | <b>Overall<br/>US OL<br/>(N=1773)</b> | <b>Anti-IL-<br/>17A<br/>(N=720)</b> | <b>Other<br/>Biologics<br/>(N=1053)</b> | <b>IXE<br/>(N=501)</b> | <b>SEC<br/>(N=219)</b> | <b>GUS<br/>(N=272)</b> | <b>RIS<br/>(N=230)</b> | <b>ADA<br/>(N=225)</b> | <b>UST<br/>(N=112)</b> | <b>TILD<br/>(N=83)</b> | <b>BROD<br/>(N=60)</b> |
|--------------------------------------------------|---------------------------------------|-------------------------------------|-----------------------------------------|------------------------|------------------------|------------------------|------------------------|------------------------|------------------------|------------------------|------------------------|
| Any current concomitant medications <sup>a</sup> | 914 (52.0)                            | 383 (53.7)                          | 531 (50.8)                              | 268 (54.3)             | 115 (52.5)             | 137 (50.7)             | 107 (46.7)             | 127 (56.7)             | 59 (54.1)              | 40 (48.2)              | 21 (35.0)              |
| Anti-depressants                                 | 145 (8.2)                             | 52 (7.3)                            | 93 (8.9)                                | 38 (7.7)               | 14 (6.4)               | 23 (8.5)               | 20 (8.7)               | 21 (9.4)               | 11 (10.1)              | 10 (12.0)              | 4 (6.7)                |
| Anxiolytics                                      | 75 (4.3)                              | 30 (4.2)                            | 45 (4.3)                                | 20 (4.0)               | 10 (4.6)               | 13 (4.8)               | 12 (5.2)               | 8 (3.6)                | 4 (3.7)                | 2 (2.4)                | 2 (3.3)                |
| Drugs for acid related disorders                 | 126 (7.2)                             | 52 (7.3)                            | 74 (7.1)                                | 39 (7.9)               | 13 (5.9)               | 12 (4.4)               | 16 (7.0)               | 26 (11.6)              | 7 (6.4)                | 9 (10.8)               | 2 (3.3)                |
| Drugs used in diabetes                           | 177 (10.1)                            | 78 (10.9)                           | 99 (9.5)                                | 51 (10.3)              | 27 (12.3)              | 25 (9.3)               | 25 (10.9)              | 21 (9.4)               | 14 (12.8)              | 5 (6.0)                | 3 (5.0)                |
| Anti-thrombotics                                 | 96 (5.5)                              | 40 (5.6)                            | 56 (5.4)                                | 30 (6.1)               | 10 (4.6)               | 10 (3.7)               | 9 (3.9)                | 15 (6.7)               | 11 (10.1)              | 7 (8.4)                | 2 (3.3)                |
| Anti-arrhythmics                                 | 57 (3.2)                              | 29 (4.1)                            | 28 (2.7)                                | 21 (4.3)               | 8 (3.7)                | 7 (2.6)                | 8 (3.5)                | 6 (2.7)                | 4 (3.7)                | 1 (1.2)                | 1 (1.7)                |
| Antihypertensives                                | 389 (22.1)                            | 184 (25.8) <sup>†</sup>             | 205 (19.6)                              | 127 (25.7)             | 57 (26.0)              | 56 (20.7)              | 43 (18.8)              | 45 (20.1)              | 29 (26.6)              | 16 (19.3)              | 7 (11.7)               |
| ACE inhibitors                                   | 196 (11.1)                            | 90 (12.6)                           | 106 (10.1)                              | 66 (13.4)              | 24 (11.0)              | 28 (10.4)              | 20 (8.7)               | 20 (8.9)               | 19 (17.6)              | 10 (12.0)              | 2 (3.3)                |
| Calcium channel blockers                         | 91 (5.2)                              | 37 (5.2)                            | 54 (5.2)                                | 27 (5.5)               | 10 (4.6)               | 17 (6.3)               | 12 (5.2)               | 11 (4.9)               | 7 (6.5)                | 3 (3.6)                | 1 (1.7)                |

Supplementary Material

|                                                       |             |                         |            |            |            |            |            |            |           |           |           |
|-------------------------------------------------------|-------------|-------------------------|------------|------------|------------|------------|------------|------------|-----------|-----------|-----------|
| Beta-blockers                                         | 105 (6.0)   | 55 (7.7)*               | 50 (4.8)   | 38 (7.7)   | 17 (7.8)   | 13 (4.8)   | 13 (5.7)   | 7 (3.1)    | 10 (9.3)  | 3 (3.6)   | 2 (3.3)   |
| Diuretics                                             | 94 (5.3)    | 50 (7.0)*               | 44 (4.2)   | 30 (6.1)   | 20 (9.1)   | 9 (3.3)    | 16 (7.0)   | 10 (4.5)   | 8 (7.3)   | 0         | 0         |
| Anti-inflammatory and anti-rheumatic products         | 172 (9.8)   | 78 (10.9)               | 94 (9.0)   | 57 (11.5)  | 21 (9.6)   | 33 (12.2)  | 16 (7.0)   | 19 (8.5)   | 8 (7.3)   | 7 (8.4)   | 2 (3.3)   |
| Lipid-modifying agents                                | 215 (12.2)  | 96 (13.5)               | 119 (11.4) | 68 (13.8)  | 28 (12.8)  | 29 (10.7)  | 27 (11.8)  | 31 (13.8)  | 12 (11.0) | 12 (14.5) | 3 (5.0)   |
| Any other prescription drug                           | 459 (26.1)  | 188 (26.4)              | 271 (25.9) | 134 (27.1) | 54 (24.7)  | 70 (25.9)  | 57 (24.9)  | 68 (30.4)  | 27 (24.8) | 16 (19.3) | 9 (15.0)  |
| Previous non-biologic systemic therapies <sup>b</sup> | 1101 (62.1) | 420 (58.4) <sup>†</sup> | 681 (64.7) | 282 (56.4) | 138 (63.0) | 153 (56.3) | 134 (58.3) | 176 (78.2) | 82 (73.2) | 54 (65.1) | 38 (63.3) |
| Acitretin                                             | 296 (16.7)  | 102 (14.2)*             | 194 (18.4) | 75 (15.0)  | 27 (12.3)  | 53 (19.5)  | 33 (14.3)  | 40 (17.8)  | 31 (27.7) | 16 (19.3) | 13 (21.7) |
| Apremilast                                            | 119 (6.7)   | 50 (7.0)                | 69 (6.6)   | 38 (7.6)   | 12 (5.5)   | 19 (7.0)   | 14 (6.1)   | 16 (7.1)   | 7 (6.3)   | 7 (8.4)   | 4 (6.7)   |
| Azathioprine                                          | 2 (0.1)     | 1 (0.1)                 | 1 (0.1)    | 0          | 1 (0.5)    | 0          | 0          | 1 (0.4)    | 0         | 0         | 0         |
| Cyclosporin                                           | 335 (18.9)  | 128 (17.8)              | 207 (19.7) | 81 (16.2)  | 47 (21.5)  | 45 (16.5)  | 52 (22.6)  | 44 (19.6)  | 23 (20.5) | 11 (13.3) | 17 (28.3) |
| Fumaric acid amino esters                             | 93 (5.2)    | 39 (5.4)                | 54 (5.1)   | 29 (5.8)   | 10 (4.6)   | 12 (4.4)   | 10 (4.3)   | 12 (5.3)   | 5 (4.5)   | 9 (10.8)  | 2 (3.3)   |
| Hydroxyurea                                           | 1 (0.1)     | 0                       | 1 (0.1)    | 0          | 0          | 0          | 0          | 1 (0.4)    | 0         | 0         | 0         |

Supplementary Material

|                                                  |            |                         |            |            |           |           |           |            |           |           |           |
|--------------------------------------------------|------------|-------------------------|------------|------------|-----------|-----------|-----------|------------|-----------|-----------|-----------|
| Isotretinoin                                     | 2 (0.1)    | 0                       | 2 (0.2)    | 0          | 0         | 0         | 0         | 2 (0.9)    | 0         | 0         | 0         |
| Methotrexate                                     | 708 (40.0) | 269 (37.4)              | 439 (41.7) | 171 (34.2) | 98 (44.7) | 99 (36.4) | 93 (40.4) | 132 (58.7) | 48 (42.9) | 28 (33.7) | 18 (30.0) |
| Mycophenolate mofetil                            | 1 (0.1)    | 0                       | 1 (0.1)    | 0          | 0         | 0         | 0         | 0          | 0         | 1 (1.2)   | 0         |
| Steroids                                         | 22 (1.2)   | 14 (1.9)*               | 8 (0.8)    | 7 (1.4)    | 7 (3.2)   | 3 (1.1)   | 1 (0.4)   | 1 (0.4)    | 2 (1.8)   | 0         | 0         |
| Other                                            | 65 (3.7)   | 17 (2.4)*               | 48 (4.6)   | 12 (2.4)   | 5 (2.3)   | 24 (8.8)  | 11 (4.8)  | 2 (0.9)    | 2 (1.8)   | 4 (4.8)   | 3 (5.0)   |
| Previous biologic therapy targeting <sup>c</sup> |            |                         |            |            |           |           |           |            |           |           |           |
| IL-17A                                           | 170 (9.6)  | 54 (7.5)*               | 116 (11.0) | 49 (9.8)   | 5 (2.3)   | 55 (20.2) | 30 (13.0) | 5 (2.2)    | 6 (5.4)   | 10 (12.0) | 7 (11.7)  |
| TNF                                              | 396 (22.3) | 188 (26.1) <sup>†</sup> | 208 (19.8) | 128 (25.6) | 60 (27.4) | 80 (29.4) | 56 (24.3) | 11 (4.9)   | 26 (23.2) | 10 (12.0) | 16 (26.7) |
| IL-12/23 p40                                     | 221 (12.5) | 79 (11.0)               | 142 (13.5) | 53 (10.6)  | 26 (11.9) | 96 (35.3) | 28 (12.2) | 3 (1.3)    | 0         | 8 (9.6)   | 7 (11.7)  |
| IL-23 p19                                        | 29 (1.6)   | 14 (1.9)                | 15 (1.4)   | 12 (2.4)   | 2 (0.9)   | 1 (0.4)   | 8 (3.5)   | 1 (0.4)    | 0         | 2 (2.4)   | 3 (5.0)   |
| IL-17 RA                                         | 16 (0.9)   | 3 (0.4)                 | 13 (1.2)   | 2 (0.4)    | 1 (0.5)   | 5 (1.8)   | 5 (2.2)   | 0          | 0         | 3 (3.6)   | 0         |

**Table S1. Concomitant medications and previous biologic and non-biologic therapy use among patients receiving US OL dosing in the PSoHO observational study.**

All results are expressed as n (%). Percentages were calculated by  $n/N \times 100\%$ . Values are rounded to 1 decimal place.

The other biologics cohort (N=1053) includes GUS (N=272), RIS (N=230), ADA (N=225), UST (N=112), TILD (N=83), BROD (N=60), CZP (N=35), ETN (N=30), and INF (N=6). Individual data not shown for CZP, ETN, or INF due to low number of patients.

## Supplementary Material

*Abbreviations: ACE, angiotensin-converting enzyme; ADA, adalimumab; BROD, brodalumab; CZP, certolizumab; ETN, etanercept; GUS, guselkumab; IL, interleukin; IL-17A, interleukin-17A; IL-17 RA, interleukin-17 receptor A; INF, infliximab; IXE, ixekizumab; PSoHO, Psoriasis Study of Health Outcomes; RIS, risankizumab; SEC, secukinumab; TILD, tildrakizumab; TNF, tumor necrosis factor; US OL, US FDA-approved on-label; UST, ustekinumab.*

<sup>†</sup>p-value <0.01 vs. the other biologics cohort.

\*p-value <0.05 vs. the other biologics cohort.

<sup>a</sup>Information about concomitant medication use missing in 14 patients.

<sup>b</sup>Information about prior non-biologic systemic therapy use missing in 1 patients.

<sup>c</sup>Information about prior biologic use missing in 1 patient.
